# Supplementary material
Source: HighWire-hosted journal article supplement (https://bjo.bmj.com/content/102/8/1114)
Supplement: inline-supplementary-material-1 [file inline-supplementary-material-1.pdf]

## Appendix: Search Strategy for Systematic Review

The literature search strategy for the systematic review to assess the outcomes for Keratolimbal Allograft (KLAL) in limbal stem cell deficiency after severe corneal chemical burns is outlined below. Search strategies for databases are listed. There were no restrictions for publication status, language or publication date. All searches were performed in April 2017.

### PubMed

```
(((((Keratolimbal allograft[tw] OR Allo limbal graft[tw] OR Limbal graft[tw] OR Keratolimbal[tw] OR Keratolimbal transplant[tw] OR Limbal transplant[tw] OR Limbal transplantation[tw] OR Limbal allograft[tw] OR Limbal stem cell transplantation[tw] OR Keratolimbal allograft[tw] OR Ocular surface reconstruction[tw] OR Limbal stem cell deficiency[tw] OR Allografts[tw] OR Allografts[mh] OR Limbal Epithelial transplantation[tw]))) AND ((Bilateral ocular chemical burns[tw] OR Ocular chemical burns[tw] OR Alkali burns[tw] OR Acid burns[tw] OR Eye Burns[tw] OR Limbus Corneae[tw] OR Eye Burns[mh] OR Burns, Chemical/Surgery[mh] OR Limbus Corneae[mh]))) NOT (animals[Mesh] NOT humans[Mesh]))
```

### EMBASE

Emtree term: Eye burn

Synonyms: burn, eye; burned eye; eye burns; eye damage, thermal; eye injury, thermal; eye thermal damage; eye thermal injury; eye thermal trauma; eye trauma, thermal; eye, burned; ocular thermal damage; ocular thermal injury; ocular thermal trauma; thermal damage, eye; thermal eye trauma; thermal injury, eye; thermal ocular injury; thermal ocular trauma; thermal trauma, eye

Emtree term: allograft

Synonyms: allogeneic graft; allografts; homograft; homologous graft; homotransplant

Emtree term: chemical burn exploded with subheading surgery

### SEARCH

```
('Eye burn'/exp OR 'burn, eye':ab,ti OR 'burned eye':ab,ti OR 'eye burns':ab,ti OR 'eye damage, thermal':ab,ti OR 'eye injury, thermal':ab,ti OR 'eye thermal damage':ab,ti OR 'eye thermal injury':ab,ti OR 'eye thermal trauma':ab,ti OR 'eye trauma, thermal':ab,ti OR 'eye, burned':ab,ti OR 'ocular thermal damage':ab,ti OR 'ocular thermal injury':ab,ti OR 'ocular thermal trauma':ab,ti OR 'thermal damage, eye':ab,ti OR 'thermal eye trauma':ab,ti OR 'thermal injury, eye':ab,ti OR 'thermal ocular injury':ab,ti OR 'thermal ocular trauma':ab,ti OR 'thermal trauma, eye':ab,ti OR 'Bilateral ocular chemical burns' OR 'Ocular chemical burns' OR 'Alkali burns' OR 'Acid burns' OR 'Limbus Corneae' OR ('chemical burn'/exp AND 'surgery'/lnk) OR 'Limbus Corneae'/exp OR 'corneal limbus':ab,ti OR 'corneoscleral limbus':ab,ti OR 'limbus':ab,ti OR 'limbus corneae':ab,ti OR 'limbus, cornea':ab,ti) AND ('allograft'/exp OR 'homograft':ab,ti OR 'homologous graft':ab,ti OR 'homotransplant':ab,ti OR 'allogeneic graft':ab,ti OR 'Keratolimbal allograft' OR 'Allo limbal graft' OR 'Limbal graft' OR 'Keratolimbal' OR 'Keratolimbal transplant' OR 'Limbal transplant' OR 'Limbal transplantation' OR 'Limbal allograft' OR 'Limbal stem cell transplantation' OR 'Keratolimbal allograft' OR 'Ocular surface reconstruction' OR 'Limbal stem cell deficiency' OR 'Allograft' OR 'Limbal Epithelial transplantation')
```

## **WEB of SCIENCE**

TS=((Keratolimbal allograft OR Allo limbal graft OR Limbal graft OR Keratolimbal OR Keratolimbal transplant OR Limbal transplant OR Limbal transplantation OR Limbal allograft OR Limbal stem cell transplantation OR Keratolimbal allograft OR Ocular surface reconstruction OR Limbal stem cell deficiency OR Allografts OR Limbal Epithelial transplantation) AND (Bilateral ocular chemical burns OR Ocular chemical burns OR Alkali burns OR Acid burns OR Eye Burns OR Limbus Corneae))

**Refined by:** [excluding] **Databases:** ( MEDLINE )

**Timespan:** All years.

Search language=Auto

## **CINAHL**

((Keratolimbal allograft OR Allo limbal graft OR Limbal graft OR Keratolimbal OR Keratolimbal transplant OR Limbal transplant OR Limbal transplantation OR Limbal allograft OR Limbal stem cell transplantation OR Keratolimbal allograft OR Ocular surface reconstruction OR Limbal stem cell deficiency OR Allografts OR Limbal Epithelial transplantation) AND (Bilateral ocular chemical burns OR Ocular chemical burns OR Alkali burns OR Acid burns OR Eye Burns OR Limbus Corneae OR Chemical Burns))

Limiters - Exclude MEDLINE records; Human

Expanders - Apply related words; Also search within the full text of the articles

Search modes - Boolean/Phrase

Interface - Nursing Reference Center Plus

Search Screen - Advanced Search

Database - Nursing Reference Center Plus;Health News;CINAHL Complete

## **COCHRANE**

((Keratolimbal allograft OR Allo limbal graft OR Limbal graft OR Keratolimbal OR Keratolimbal transplant OR Limbal transplant OR Limbal transplantation OR Limbal allograft OR Limbal stem cell transplantation OR Keratolimbal allograft OR Ocular surface reconstruction OR Limbal stem cell deficiency OR Allografts OR Limbal Epithelial transplantation) AND (Bilateral ocular chemical burns OR Ocular chemical burns OR Alkali burns OR Acid burns OR Eye Burns OR Limbus Corneae OR Chemical Burns))

Expanders - Apply related words; Also search within the full text of the articles; Apply equivalent subjects

Search modes - Boolean/Phrase

Interface - EBSCOhost Research Databases

Search Screen - Advanced Search

Database - Cochrane Database of Systematic Reviews;Cochrane Central Register of Controlled Trials;Database of Abstracts of Reviews of Effects;NHS Economic Evaluation Database;Health Technology Assessments;Cochrane Methodology Register

## **LILACS**

tw:(((keratolimbale allograft OR allo limbale graft OR limbale graft OR keratolimbale OR keratolimbale transplant OR limbale transplant OR limbale transplantation OR limbale allograft OR limbale stem cell transplantation OR keratolimbale allograft OR ocular surface reconstruction OR limbale stem cell deficiency OR allografts OR limbale epithelial transplantation)and (bilateral ocular chemical burns OR ocular chemical burns OR alkali burns OR acid burns OR eye burns OR limbale corneae OR chemical burns))) AND (instance:"regional") AND ( limit:"humans")

## **Guideline.gov**

((Keratolimbale allograft OR Allo limbale graft OR Limbale graft OR Keratolimbale OR Keratolimbale transplant OR Limbale transplant OR Limbale transplantation OR Limbale allograft OR Limbale stem cell transplantation OR Keratolimbale allograft OR Ocular surface reconstruction OR Limbale stem cell deficiency OR Allografts OR Limbale Epithelial transplantation)AND (Bilateral ocular chemical burns OR Ocular chemical burns OR Alkali burns OR Acid burns OR Eye Burns OR Limbale Corneae OR Chemical Burns))
